# Supplementary material for: Loss of Function of the RRMF Domain in OsROS1a Causes Sterility in Rice (Oryza sativa L.)
Source: MDPI journal article supplement (doi:10.3390/ijms231911349), 2022-09-26
Supplement: s1 [file s1]

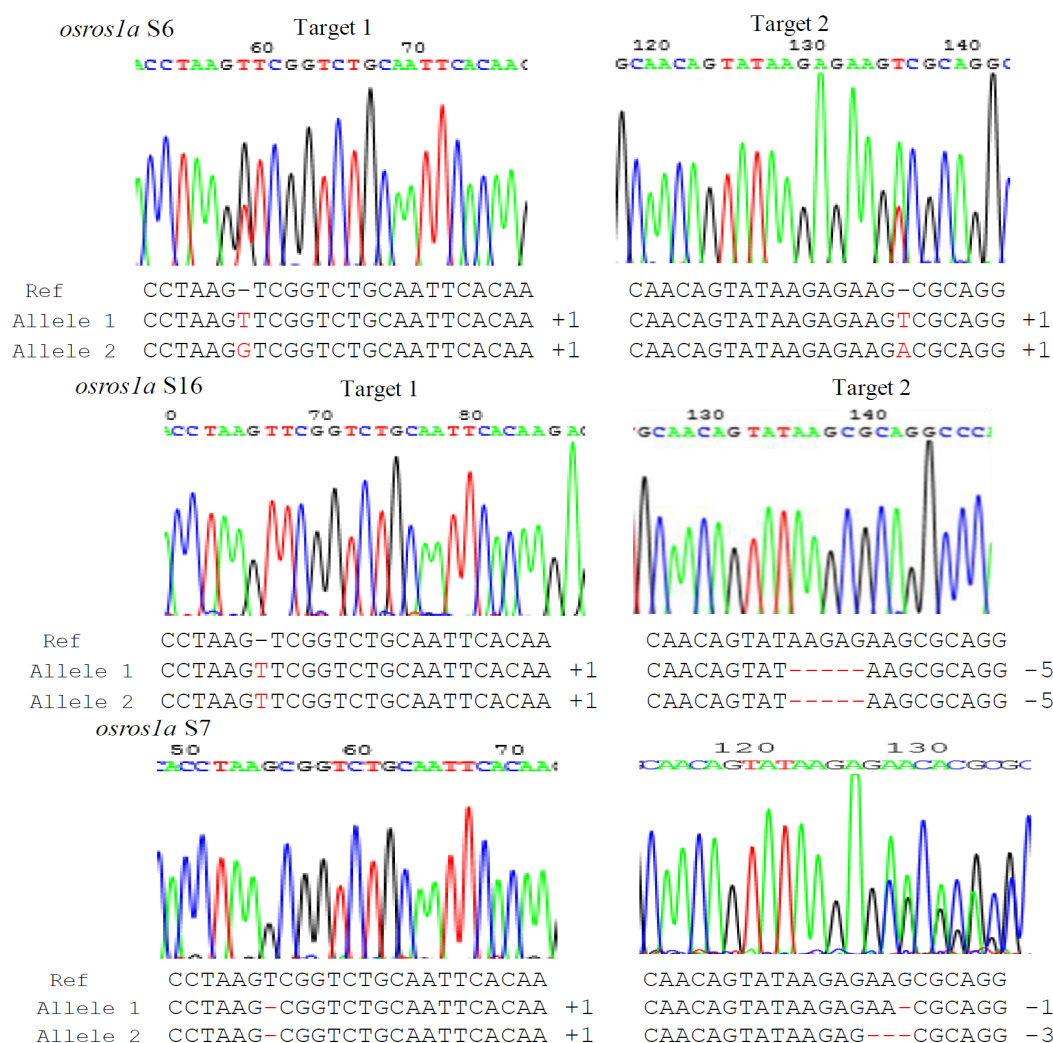

**Figure S1. DNA sequencing chromatograms of *osros1a* mutants.** Two targets were showed, and the indels in the target sites were showed red letters and dashes.

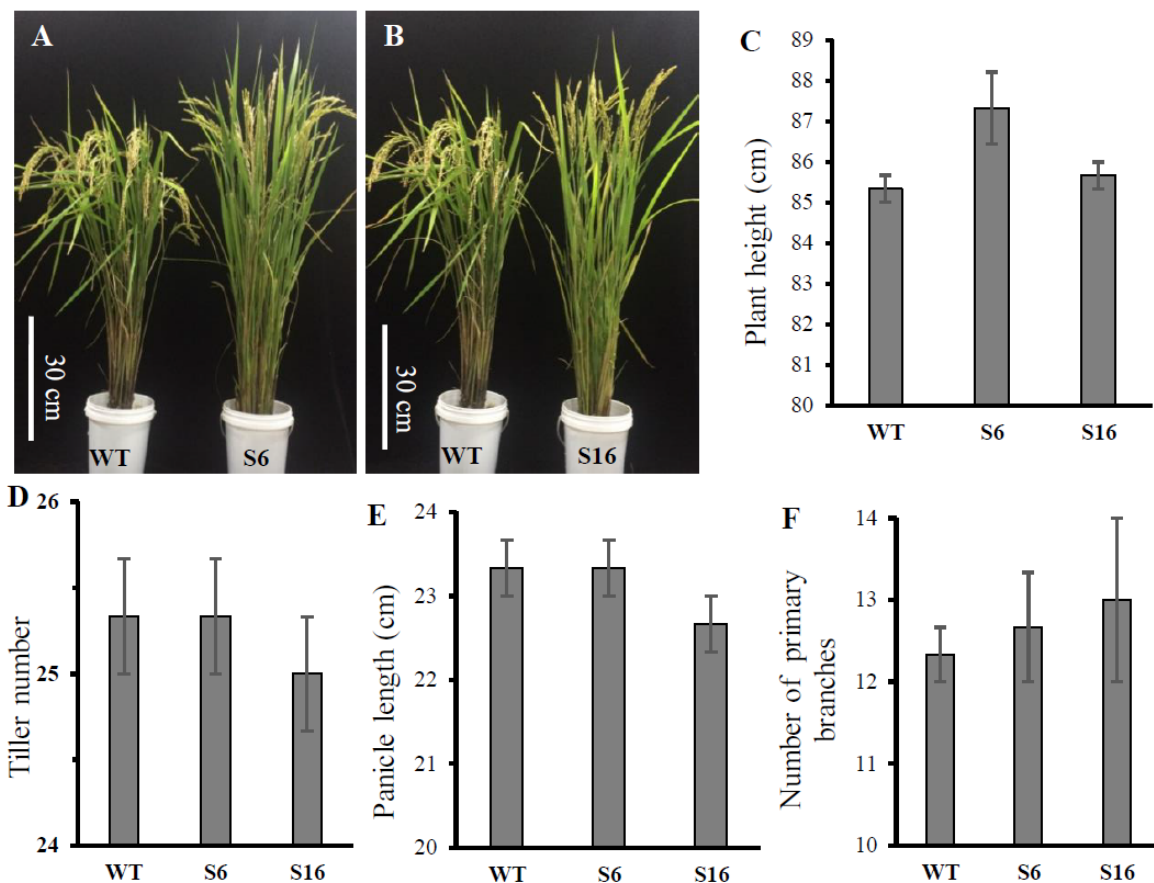

**Figure S2. Phenotype comparison of the WT with *osros1a* mutants.** The plant phenotypes of (A) WT and S6; (B) WT and S16. (C) Plant height, (D) Tiller number, (E) Panicle length and (F) primary branches number of WT, *osros1a* S6 and S16 mutants. Data are means  $\pm$  SD (n = 3).

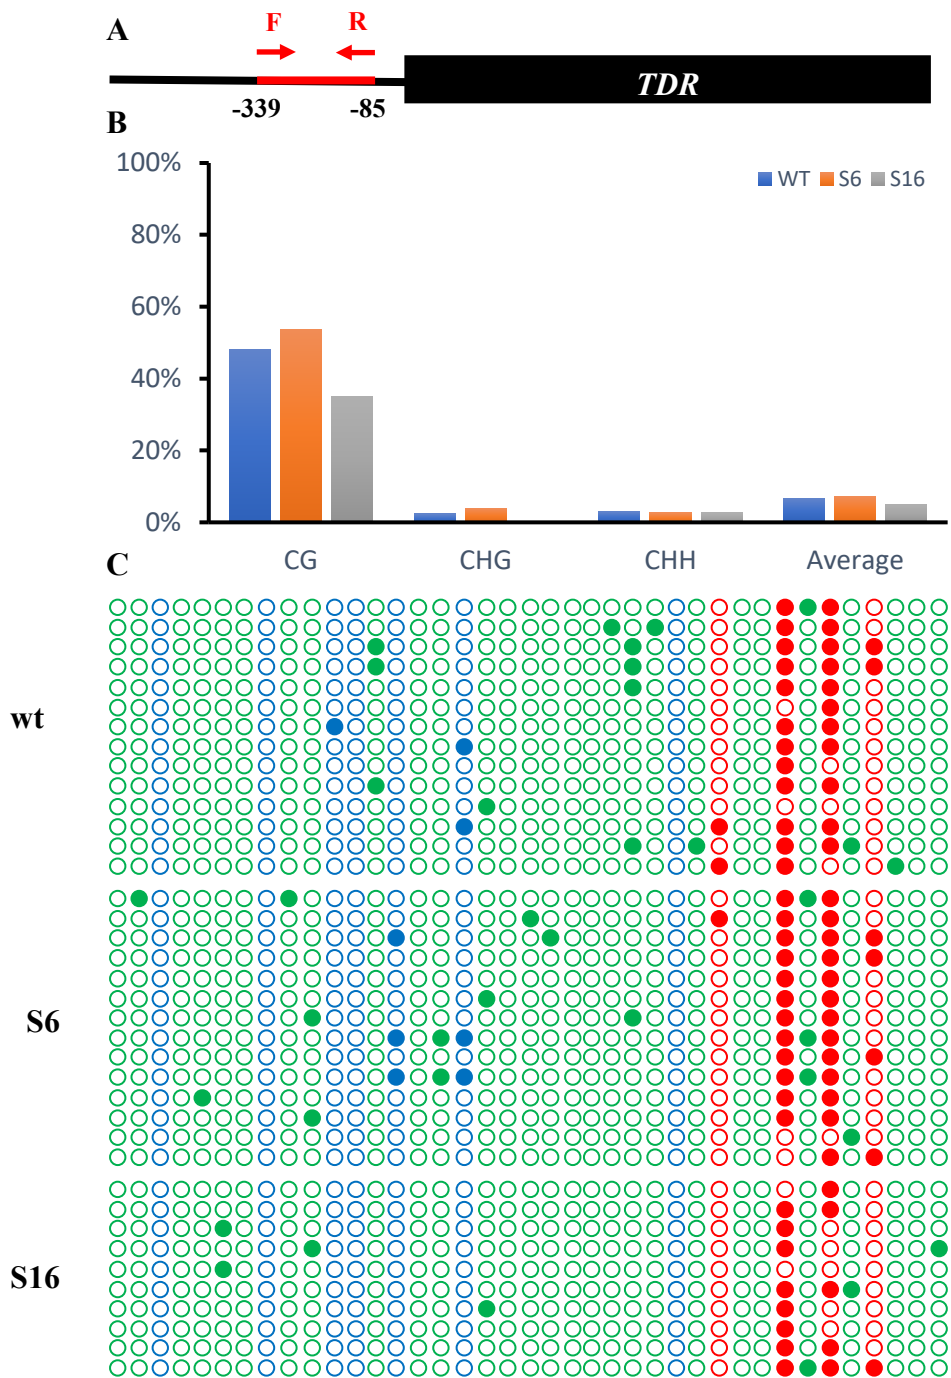

**Figure S3. The DNA methylation of *TDR* gene promoter in young panicle.** (A) The diagram of bisulfite sequencing of 225-bp *TDR* promoter. (B) The statistics of bisulfate sequencing of 225-bp *TDR* promoter in WT and *osros1a* mutants. (C) The dot plot comparison of DNA methylation between WT and *osros1a* mutants.

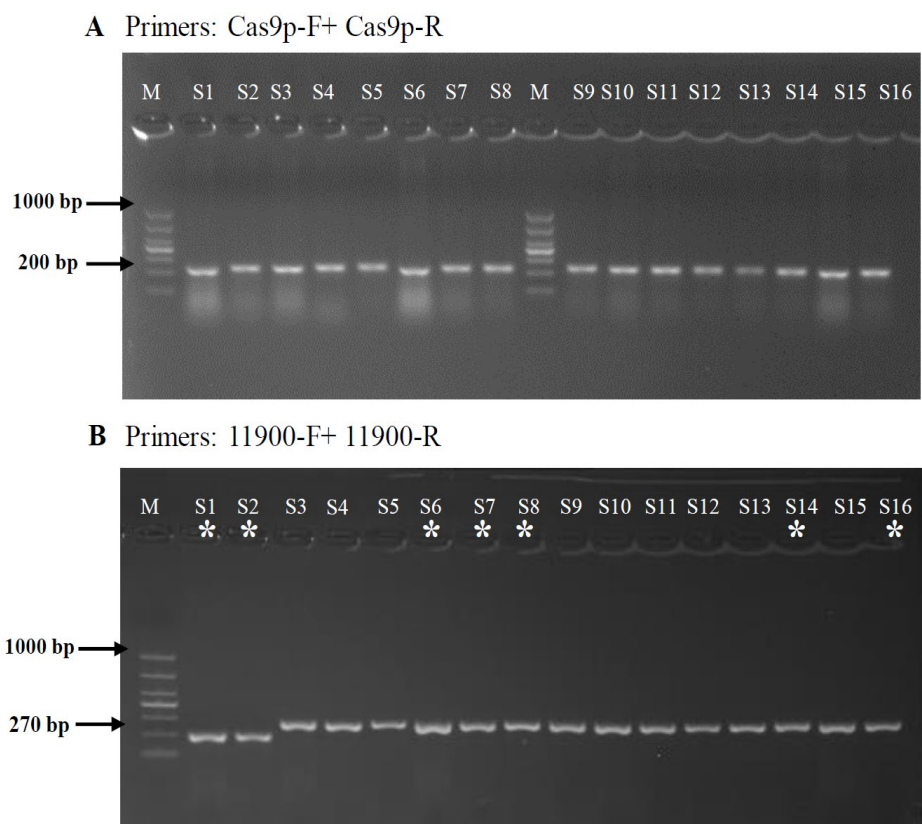

**Figure S4. PCR of *OsROS1a* gene editing plants (A) with Cas9 primers and (B) with knockout target-specific primers. The white asterisk denotes the *osros1a* mutant lines.**

**Supplementary Table S1. Primers used in this study.**

|                                           |                             |
|-------------------------------------------|-----------------------------|
| OSU6a promoter                            |                             |
| sg 11900.1F                               | GCCGTGTGAATTGCAGACCGACTT    |
| sg 11900.1R                               | AAACAAGTCGGTCTGCAATTCACA    |
| OSU6b promoter                            |                             |
| sg 11900.2F                               | GTTGCAACAGTATAAGAGAAGCGC    |
| sg 11900.2R                               | AAACGCGCTTCTCTTATACTGTTG    |
| pollen and anther related gene expression |                             |
| Actin F                                   | CGTATGAGCAAGGAGATCAC        |
| Actin R                                   | CACATCTGTTGGAAGGTGCT        |
| <i>OsROS1a</i> -F                         | ATCCTTGCCCATACCTAC          |
| <i>OsROS1a</i> -R                         | AGCAGTGTCCCTCGAACT          |
| TDR F                                     | GGAGGTGGCACCAGTTTG          |
| TDR R                                     | AGGAGTCCAGTGGGATTGA         |
| OsPKS2 F                                  | ACTCTGTACCGTACCTGATCCA      |
| OsPKS2 R                                  | GTCACCGCCTTGTTGGAGATG       |
| CYP704B2 F                                | CGACATGCCTTTCACCTCCT        |
| CYP704B2 R                                | TGGAGGCAAACCTCGAAGCTC       |
| CSA F                                     | AGAACTGGAACCTCATCGCC        |
| CSA R                                     | GACGTGCCAGTGGTTCTTGA        |
| OspPGM-F                                  | CTGCTCAGATTATCACTAAAATTG    |
| OspPGM-R                                  | AGAGCTAGGTCTATTAAAGGCTTC    |
| BZR1 F                                    | CCACCTACCGCAAGGGATG         |
| BZR1 R                                    | GTATCGTGTCCGGGTGCT          |
| Bisulfite                                 |                             |
| OsPKS2-BS- F                              | TAAAGTTATTAGAGGTGAGGGTTTG   |
| OsPKS2-BS- R                              | AACCCTAAAAAAATTAAAATAAATATC |
| TDR-BS-F                                  | TGGAGAGGGATTAGATTAGTTTAAGG  |
| TDR-BS-R                                  | ATAAAAATTTTCTAACTCCAATACAAA |
